# The Effects of Shift Work on Sleeping Quality, Hypertension and Diabetes in Retired Workers

Yanjun Guo<sup>1,2</sup>, Yuewei Liu<sup>1,2</sup>, Xiji Huang<sup>1,2</sup>, Yi Rong<sup>1,2</sup>, Meian He<sup>1,2</sup>, Youjie Wang<sup>1,2</sup>, Jing Yuan<sup>1,2</sup>, Tangchun Wu<sup>1,2</sup>, Weihong Chen<sup>1,2\*</sup>

**1** Department of Occupational and Environmental Health, School of Public Health, Tongji Medical College, Huazhong University of Science and Technology, Wuhan, China, **2** Key Laboratory of Environment and Health in Ministry of Education & Ministry of Environmental Protection, and State Key Laboratory of Environmental Health (Incubating), School of Public Health, Tongji Medical College, Huazhong University of Science and Technology, Wuhan, China

## Abstract

**Background:** Shift work has been associated with adverse health effects by disturbing circadian rhythms. However, its potential long-term health effects and the persistent effects after leaving shifts have not been well established.

**Methods and Results:** We studied 26,463 workers from Tongji-Dongfeng Cohort in China. All the participants are retired employees of Dongfeng Motor Company. Information on demographics, occupational history and medical history were gathered through questionnaires. After adjusting potential confounders in the logistic regression models, shift work was associated with poor sleeping quality, diabetes and hypertension independently. We observed significant effects of shift work on poor sleeping quality, diabetes and hypertension; the ORs (95%CI) are 1.18 (1.09–1.27), 1.10 (1.03–1.17) and 1.05 (1.01–1.09) respectively. In the further analysis, we found elevated ORs (95%CI) for participants with poor sleeping quality, the ORs (95%CI) are 1.34 (1.08–1.60), 1.13 (1.05–1.21), 1.05 (1.03–1.07) and 1.05 (1.01–1.09) for 1–4, 5–9, 10–19,  $\geq 20$  years of shift work respectively. However, with the extension of leaving shift work duration, the effects of shift work on sleep quality gradually reduced.

**Conclusions:** Shift work may be an independent risk factor for sleeping quality, diabetes and hypertension even in retired workers. Applicable intervention strategies are needed for prevention of sleep loss, diabetes, and hypertension for shift workers.

**Citation:** Guo Y, Liu Y, Huang X, Rong Y, He M, et al. (2013) The Effects of Shift Work on Sleeping Quality, Hypertension and Diabetes in Retired Workers. PLoS ONE 8(8): e71107. doi:10.1371/journal.pone.0071107

**Editor:** Thomas Behrens, Universität Bochum, Germany

**Received:** April 7, 2013; **Accepted:** June 25, 2013; **Published:** August 16, 2013

**Copyright:** © 2013 Guo et al. This is an open-access article distributed under the terms of the Creative Commons Attribution License, which permits unrestricted use, distribution, and reproduction in any medium, provided the original author and source are credited.

**Funding:** Funding was provided by the National Basic Research Program (2011CB503800) and the National Basic Research Program (2011CB503804). The funders had no role in study design, data collection and analysis, decision to publish, or preparation of the manuscript.

**Competing Interests:** The authors have declared that no competing interests exist.

\* E-mail: wchen@mails.tjmu.edu.cn

## Introduction

Shift work is an employment practice designed to make workers taking turns to have a rest and factories running all day. The term "shift work" normally includes both long-term night shifts and work schedules in which employees change or rotate shifts. With the rapid progress of industry worldwide, shift work itself remains necessary in many occupations and the demands of round-the-clock services have increased in some companies [1,2]. Recent investigations reported that shift workers took up more than 20% of the whole working population in industry countries. And the population of shift workers is still on the rise in China [3,4].

Our bodies are verified to have a regulatory mechanism to adjust the circadian rhythm [5]. Circadian rhythm mainly presents in sleeping and feeding patterns, and also in patterns of core body temperature, brain wave activity, hormone production and other biological activities. These patterns will be disturbed when circadian rhythms changes. Therefore, shift work is recognized as a risk factor for many health problems, and may cause many negative cognitive effects. Studies have confirmed that shift work could disrupt sleep patterns as well as physiologic circadian

rhythms [6,7,8]. Recent studies have focused on the potential health effects of shift work on acute or chronic sleep deprivation, hypertension, cardiovascular diseases and series of metabolic disorders, such as type 2 diabetes and metabolic syndrome [2,3,9,10,11,12].

Previous studies suggested that most shift workers were not able to adjust their circadian rhythms to the atypical timetable when they first started shift work [13,14]. Some of them then suffer from sleep loss and poor quality of sleep. The results of Monk *et al* confirmed that shift workers suffered from worse sleep comparing with day workers, even in retirement [15]. In addition, the extension of shift work may cause more serious health problems. Recently, a long-term prospective study have reported that a modestly increased risk of type 2 diabetes was associated with an extended duration of shift work [2]. However, there are few studies focusing on the association between duration of shift work and the adverse health effects. Furthermore, it is still not clear whether shift workers could get rid of the effects caused by shift work and reduce the health damage after leaving shifts position.

Therefore, we presented results from Dongfeng-Tongji cohort (DFTJ cohort) of 26463 retired workers. Our objectives were to

quantify the association of shift work with sleeping quality, diabetes and hypertension, and to evaluate the persistent effects of shift work on sleeping quality after leaving from shift work.

## Methods

### Ethics Statement

The study protocol was approved by the institutional review boards of Dongfeng Motor Corporation (DMC) and Tongji Medical College Institutional review Board, School of Public Health, Tongji Medical College, Huazhong University of Science & Technology (Wuhan, Hubei, China). All participants provided written informed consent.

### Study Population

We used data from the baseline survey of DFTJ cohort which has reported in previous study [16]. In brief, 27,009 retired workers were included in the cohort if they were covered by Dongfeng Motor Corporation's (DMC's) health care service systems and agreed to provide baseline blood samples and questionnaire information between September, 2008 and June, 2010. Standard questionnaires and physical examinations were performed at baseline to collect and update information on demographics, occupational history, medications, self-reported medical history, and lifestyles. Information was collected by trained interviewers through face to face interviews. Trained investigators entered questionnaires into computer twice using EpiData software. And a group of trained investigators performed quality control by rechecking the entered data. In this study, participants were excluded if they provided no information on demographics ( $n = 204$ ), occupational history ( $n = 241$ ) or sleeping quality ( $n = 101$ ). Finally, 26,463 participants were included.

### Ascertainment of Shift Work

Information on shift work was collected via questionnaires. Shift work was defined as any work schedule involving unusual or irregular working hours as opposed to a normal daytime work schedule: 8:00 AM to 17:00 PM. According to the distribution of shift work years, we categorized shift work into five categories: never, 1–4, 5–9, 10–19,  $\geq 20$  years in the final analysis.

Years after leaving shift work were defined as the duration from the year they left shift work to 2008. Years after leaving shift work was then grouped into four categories:  $< 10$ , 10–19, and  $\geq 20$  basing on the grouping method of shift work in the final analysis.

### Ascertainment of Sleeping Quality

Sleeping quality in the last year was evaluated by three pre-specified response categories: normal quality, impaired quality, and poor quality. The questions were designed according to Pittsburgh Sleep Quality Index (PSQI). Normal quality was defined as (1) falling sleep in 30 minute, (2) hard to weak up at night, (3) having a high spirit in daytime. Poor sleeping quality was defined as having symptoms of sleep deprivation, such as insomnia, taking sleeping peels. And impaired sleeping quality was slightly impaired and represented the status between normal sleeping quality and poor quality; participants in this group had one of the following situations (1) difficulties in falling asleep ( $\geq 3$  times per week); (2) easily wake up at night ( $\geq 3$  times per night); (3) have night mares at night frequently ( $\geq 3$  times per week).

### Ascertainment of Diabetes and Hypertension

The fast glucose was tested by ARCHITECT CI8200, Abbott, USA for participants. In our study, diabetes was diagnosed if participants met any of the following standards: (1) fasting plasma

glucose level  $\geq 7.0$  mmol/l; repeated measurements were done to confirm the diagnosis on different days if the participants do not have any symptoms of diabetes. (2) self-reported clinically diagnosed diabetes (by glucose tolerance test) and using hypoglycemic drugs.

Individuals were defined as hypertension if they meet one of the following standards: (1) self-reported physician diagnosis hypertension; (2) systolic pressure  $\geq 140$  mmHg or diastolic pressure  $\geq 90$  mmHg. Each participants was diagnosed after determining three times of resting blood pressure in this study [16,17,18].

### Statistical Analyses

Demographic, lifestyle and occupational characteristics distributions at baseline were compared between rotating shift workers and day workers by Chi-square test and Student-T test for classified variables and continuous variables respectively.

Logistic regression model was used to calculate the odds ratio (OR) and 95% confidence interval (CI) for sleeping quality, diabetes and hypertension according to shift work and duration of shift work. The comparison group was retired workers who hadn't engaged in shift work. In the multivariate-adjusted models, we adjusted for gender, age ( $< 60$  y, 60–75 y,  $\geq 75$  y), race (Han, others), marital status (single or divorced, married), current smoking status (no, yes), passive smoking (no, yes), current drinking status (no, yes), tea or coffee consumption (no, yes), life stress (no, yes), physical activity (no, yes) and body mass index (BMI) ( $< 18.5$ , 18.5–24, 24–28,  $\geq 28$ ). For sleeping quality, we also adjusted chronic diseases (no, yes) including diabetes, chronic obstructive pulmonary diseases, all cancer and cardiovascular diseases. Because previous studies have reported that chronic diseases will have some impact on sleeping quality. Physical activities contain many aspects of activities, such as, walking, dancing, cycling, running, swimming and so on. Physical activity is defined as "yes" if the participant exercises  $\geq 2$  times per week and each time  $\geq 20$  minutes. Life stress is defined as 'yes' if the participants feel nervous, upset or even despair of daily life equal or more than 3 times per week. BMI was included in the multivariate-adjusted models, because studies have suggested that BMI was a mediate variable for diabetes. All  $p$ -values were two sided with a significant level at 0.05, and data were analyzed with SAS 9.1 (SAS Institute Inc. Cary, NC, USA).

### Results

A total of 26,463 participants (11,822 males, 44.7%) were included in this study. The average age of all participants was 63.6 years old in 2008. The baseline characteristics for participants are presented in Table 1. There are 9,118 (34.5%) participants engaged in shift work for at least 1 year. Percentages of current smoking, passive smoking and current drinking for shift workers were significantly higher than those of day workers ( $P < 0.01$ ). For education, there are 69.8% shift workers and 63.1% day workers attended junior high school or below. In shift workers, the percentage of BMI  $> 24$  was 52.4 which was lower than day workers (53.7%), but the difference is not statistically significant. Compared with day workers suffering poor sleeping quality (11.1%), shift workers with bad sleep (12.9%) was significant higher ( $P < 0.01$ ).

In comparison to day workers, average blood pressure and fasting glucose for shift workers were significantly elevated ( $P < 0.01$ ) (Table 2). The levels of total cholesterol and high-density lipoprotein cholesterol for shift workers were lower than those of day workers. Hemoglobin and platelet count in shift workers were higher than day workers.

**Table 1.** The characteristics of the study population according to shift work.

| Variables                   | Total        | Shift work   |              | P value            |
|-----------------------------|--------------|--------------|--------------|--------------------|
|                             |              | Never        | ≥1 y         |                    |
| <b>Gender</b>               |              |              |              | <0.01*             |
| Male                        | 11,822       | 7,648        | 4,174        |                    |
| Female                      | 14,641       | 9,697        | 4,944        |                    |
| <b>Age</b>                  |              |              |              | <0.01*             |
| <60                         | 7,745        | 4,618        | 3,127        |                    |
| 60–75                       | 16,293       | 10,931       | 5,362        |                    |
| ≥75                         | 2,425        | 1,796        | 629          |                    |
| <b>Age (Mean±SD)</b>        | 63.589±7.796 | 64.216±7.801 | 62.396±7.647 | <0.01 <sup>#</sup> |
| <b>BMI</b>                  |              |              |              | 0.21*              |
| <18.5                       | 1,374        | 910          | 464          |                    |
| 18.5–24                     | 7,120        | 7,120        | 3,844        |                    |
| 24–28                       | 6,844        | 3,264        | 3,580        |                    |
| ≥28                         | 2,471        | 1,241        | 1,230        |                    |
| <b>BMI (Mean±SD)</b>        | 23.887±5.154 | 23.938±5.136 | 23.788±5.187 | 0.28 <sup>#</sup>  |
| <b>Race</b>                 |              |              |              |                    |
| Han                         | 26,702       | 17,099       | 8,973        | 0.27*              |
| Others                      | 391          | 246          | 145          |                    |
| <b>Education</b>            |              |              |              | <0.01*             |
| Junior high school or below | 17,310       | 10,942       | 6,368        |                    |
| Senior high school or above | 9,153        | 6,403        | 2,750        |                    |
| <b>Marriage</b>             |              |              |              | 0.05*              |
| Single or divorced          | 3,358        | 2,251        | 1,107        |                    |
| Married                     | 23,105       | 15,094       | 8,011        |                    |
| <b>Current Smoking</b>      |              |              |              | <0.01*             |
| No                          | 21,761       | 14,441       | 7,320        |                    |
| Yes                         | 4,702        | 2,904        | 1,798        |                    |
| <b>Passive Smoking</b>      |              |              |              | <0.01*             |
| No                          | 21,237       | 14,275       | 6,962        |                    |
| Yes                         | 5,226        | 3,070        | 2,156        |                    |
| <b>Current Drinking</b>     |              |              |              | <0.01*             |
| No                          | 20,965       | 13,921       | 7,044        |                    |
| Yes                         | 5,498        | 3,424        | 2,074        |                    |
| <b>Physical activity</b>    |              |              |              | 0.04*              |
| No                          | 3,009        | 2,022        | 987          |                    |
| Yes                         | 23,454       | 15,323       | 8,131        |                    |
| <b>Sleeping Quality</b>     |              |              |              | <0.01*             |
| Poor                        | 3,096        | 1,922        | 1,174        |                    |
| Impaired                    | 14,209       | 9,417        | 4,792        |                    |
| Normal                      | 9,158        | 6,006        | 3,152        |                    |

Abbreviation: SD, standard deviation; BMI, body mass index. Variable are given as Mean±SD for numerical data, and frequency for categorical data.

\*Chi-square test for categorical data;

<sup>#</sup>Independent sample t-test for numerical data.

doi:10.1371/journal.pone.0071107.t001

We examined the effects on sleeping quality, diabetes and hypertension according to the duration of shift work (Table 3). In both single factor logistic regression and multivariate-adjusted model, we observed slightly decreased relations of poor sleeping quality with the extension of shift work durations. Compared with day workers, the ORs (95% CI) were 0.97 (0.93–1.01) and 1.18

(1.09–1.27) for shift workers with impaired sleeping quality and poor sleeping quality, respectively. In the categorical analysis, we found that the ORs of shift work on sleeping quality decreased when the duration of leaving from shift work extended (Figure 1). Shift work also increased ORs for diabetes and hypertension. Compared with people without shift work history, the ORs

**Table 2.** The baseline levels of biochemical traits of the participants according to shift work (Mean±SD).

| Variables                   | Total        | Shift work   |              | P value |
|-----------------------------|--------------|--------------|--------------|---------|
|                             |              | Never        | ≥1 y         |         |
| Waist                       | 83.24±9.51   | 83.32±9.47   | 83.09±9.56   | 0.07    |
| Weight                      | 63.50±10.44  | 63.52±10.44  | 63.48±10.44  | 0.80    |
| SBP                         | 129.93±18.74 | 129.44±18.76 | 130.19±18.73 | <0.01   |
| DBP                         | 77.88±10.89  | 77.58±10.86  | 78.47±10.94  | <0.01   |
| <b>Hematological traits</b> |              |              |              |         |
| RBC (t/l)                   | 4.56±0.47    | 4.56±0.46    | 4.57±0.48    | 0.19    |
| WBC (g/l)                   | 6.07±1.68    | 6.06±1.68    | 6.08±1.67    | 0.31    |
| Haemoglobin (g/l)           | 136.58±14.42 | 136.15±14.21 | 137.37±14.77 | <0.01   |
| Platelet count (g/l)        | 186.90±56.86 | 184.93±55.67 | 190.59±58.86 | <0.01   |
| Fasting glucose (mmol/l)    | 6.07±1.74    | 6.01±1.73    | 6.10±1.75    | <0.01   |
| <b>Lipids</b>               |              |              |              |         |
| TC (mmol/l)                 | 5.18±0.98    | 5.19±0.98    | 5.15±0.98    | 0.02    |
| TG (mmol/l)                 | 1.46±1.15    | 1.46±1.17    | 1.46±1.11    | 0.88    |
| HDL-C (mmol/l)              | 1.44±0.41    | 1.44±0.40    | 1.43±0.43    | 0.03    |
| LDL-C (mmol/l)              | 3.02±0.84    | 3.02±0.84    | 3.02±0.83    | 0.83    |

Abbreviation: SBP, Systolic blood pressure; DBP, diastolic blood pressure; RBC, red blood cell; WBC, white blood cell; TC, total cholesterol; TG, total triglycerides; HDL-C, high-density lipoprotein cholesterol; LDL-C, low-density lipoprotein cholesterol.

P values were calculated by independent sample t-test for numerical data.

doi:10.1371/journal.pone.0071107.t002

(95%CI) of shift workers are 1.10 (1.03–1.17) and 1.05 (1.01–1.09) for diabetes and hypertension, respectively. In the further analysis,

we examined that persistently exposure to shift work would increase the ORs of diabetes and hypertension stably (Table 3).

## Discussion

Our findings provided evidence that shift work was associated with increased risk of poor sleeping quality, diabetes and hypertension in retired workers. We found that short-term (<10 years) shift work mainly affected sleeping quality, but the impact on poor sleeping quality would last for 20 years after ceasing shift work. On the other hand, long-term (>10 years) shift work was associated with elevated risk of diabetes and hypertension. This study has significant importance for occupational health because of an increasing population on shift work worldwide.

The results of this study confirmed the elevated percentage of poor sleeping quality in shift workers, especially for those who involved in shift work for less than 20 years. Sleep is increasingly recognized as an important factor in the homeostasis of multiple body functions [19]. Many adverse health effects such as anxiety, endocrine disorders could hit the body following sleep deprivation [5,14,20,21,22]. Shift work, especially night rotating shift work, could reduce sleep quality directly by disturbing chronobiological rhythms [4,23,24,25,26] and reducing the secretion of melatonin [24]. During shift work, the workers have to change the bed time frequently [27,28]. They would suffer from sleeping problems when the mismatch between their endogenous circadian rhythms and shift work appeared [29,30]. Another reason to cause sleep deprivation was that some shift workers had to sleep at daytime which could be disturbed by bright light and noise. Similar results were reported by Gumenyuk, *et al.* They have discovered that lots of shift workers had problems in adjusting their circadian rhythms to the atypical timetable in the early duration of shifts [13]. Similarly, we observed that the influence on sleeping quality gradually decreased for those with long-term shift work of more than 20 years. Perhaps, after long-term shift work, the bodies may adapt to the rhythm of shifts slowly. Another possible reason is the selection by the participants of later chronotypes. The studies of Myriam Juda and colleagues suggested that chronotype modulated

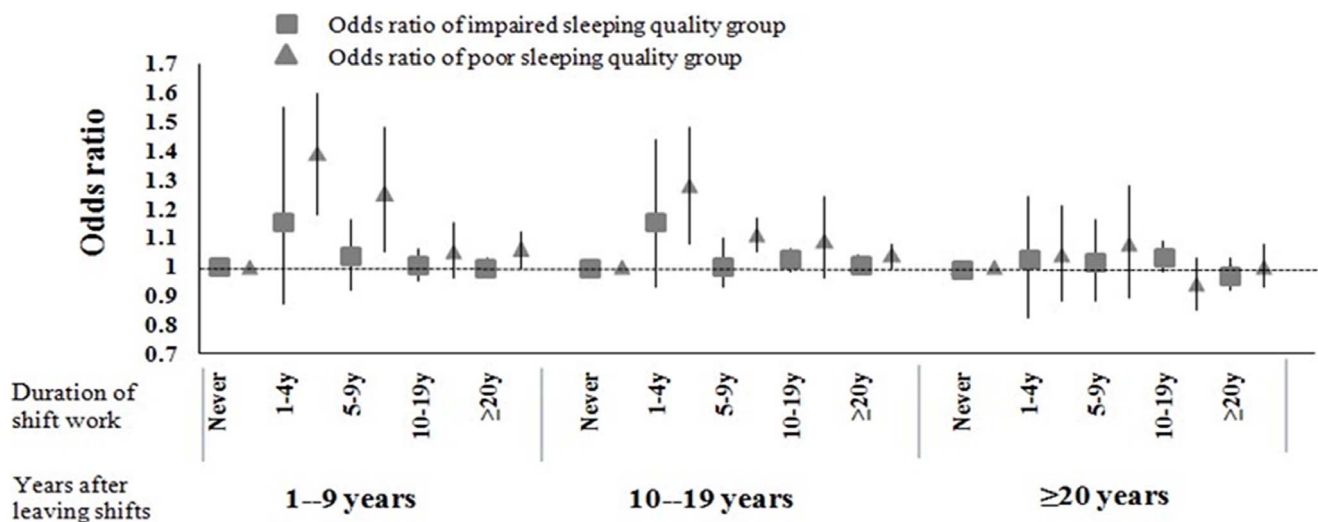

**Figure 1. Odds ratio of impaired and poor sleeping quality according to duration of shift work and years after leaving shifts.** The figure shows odds ratio of impaired and poor sleeping quality comparing to normal sleeping quality group according to duration shift work and duration of leaving shifts. The model adjusted for gender (male, female), age (<60 y, 60–75 y, ≥75 y), race (Han, others), marital status (single or divorced, married), tea consumption (no, yes), life stress (no, yes), current smoking status (no, yes), passive smoking (no, yes), current drinking status (no, yes), physical activity (no, yes), body mass index (<18.5, 18.5–24, 24–28, ≥28), chronic diseases (no, yes). doi:10.1371/journal.pone.0071107.g001

**Table 3.** Odds ratio of all levels for sleeping quality, diabetes and hypertension by duration of shift work.

| Variables                          | Duration of Shift Work |                  |                  |                  |                  |
|------------------------------------|------------------------|------------------|------------------|------------------|------------------|
|                                    | Never                  | 1–4 y            | 5–9 y            | 10–19 y          | ≥20 y            |
| <b>Number of participants</b>      | 17,345                 | 1,562            | 1,334            | 3,205            | 3,017            |
| <b>Sleeping Quality*</b>           |                        |                  |                  |                  |                  |
| <b>Model 1</b>                     |                        |                  |                  |                  |                  |
| Impaired                           | 1.00                   | 1.16 (0.99–1.36) | 1.06 (0.94–1.20) | 0.99 (0.92–1.08) | 0.94 (0.87–1.11) |
| Poor                               | 1.00                   | 1.36 (1.09–1.70) | 1.32 (1.10–1.58) | 1.24 (1.10–1.40) | 1.02 (0.90–1.14) |
| <b>Multivariate-Adjusted Model</b> |                        |                  |                  |                  |                  |
| Impaired                           | 1.00                   | 1.19 (1.01–1.37) | 1.01 (0.92–1.10) | 1.00 (0.98–1.02) | 0.99 (0.95–1.03) |
| Poor                               | 1.00                   | 1.34 (1.08–1.60) | 1.13 (1.05–1.21) | 1.05 (1.03–1.07) | 1.05 (1.01–1.09) |
| <b>Diabetes</b>                    |                        |                  |                  |                  |                  |
| Model 1                            | 1.00                   | 0.92 (0.76–1.12) | 1.01 (0.87–1.17) | 1.10 (1.00–1.22) | 1.16 (1.06–1.27) |
| Multivariate-Adjusted Model        | 1.00                   | 0.99 (0.81–1.20) | 1.06 (0.99–1.14) | 1.07 (1.03–1.10) | 1.05 (1.03–1.08) |
| <b>Hypertension</b>                |                        |                  |                  |                  |                  |
| Model 1                            | 1.00                   | 0.97 (0.84–1.13) | 1.02 (0.91–1.15) | 1.06 (0.93–1.09) | 1.04 (0.9–1.14)  |
| Multivariate-Adjusted Model        | 1.00                   | 1.03 (0.89–1.20) | 1.05 (0.99–1.11) | 1.03 (1.00–1.06) | 1.02 (1.01–1.03) |

Model 1 : single factor logistic regression.

Multivariate-adjusted model: adjusted for gender (male, female), age (<60 y, 60–75 y, ≥75 y), race (Han, others), marital status (single or divorced, married), tea consumption (no, yes), life stress (no, yes), current smoking status (no, yes), passive smoking (no, yes), current drinking status (no, yes), physical activity (no, yes) and body mass index (<18.5, 18.5–24, 24–28, ≥28).

\*We adjusted chronic diseases (no, yes) except all the confounders in Multivariate-adjusted model.

The reference group was normal sleeping quality group and participants who did not work on shift position.

doi:10.1371/journal.pone.0071107.t003

sleep duration and sleep quality in a population of workers employed in rotating schedules [31,32]. The participants of later chronotypes experienced the highest constraints on sleep on morning-shift days and fewer effects were observed on their sleep quality. They would like to engage in long-term night shift work than others. Both selection by the participants of later chronotypes and adaptation may explain no significance effect on sleep quality of workers with longer night shift work duration.

Furthermore, our findings also suggested that sleep deprivation symptoms could be reduced after ceasing shift work. The effect on sleeping quality may return to the baseline level after 20 years of ceasing shift work. These results suggested that the first few years might be the most difficult time for shift workers to adjust themselves to regular circadian rhythms. More information or prevention on sleep deprivation should be provided to employees when they start shifts.

Our data suggested that ORs for diabetes significantly increased in participants working as shift workers for at least 10 years when compared with day workers. Several studies have reported that shift work was an independent risk factor for the onset of diabetes mellitus in Japanese population [1,33,34]. However, they didn't consider the role of duration of shift work. We noted that risk of diabetes gradually elevated as the extension of shift work life in this study. The risk of diabetes was not increased for those engaged in shift work less than 5 years. The possible mechanisms inducing diabetes are shift work altered lifestyles and chronic work stress [35,36]. The study conducted by Pan *et al* also revealed that shift work induced type2 diabetes by increased BMI in American nurse's cohorts [2]. But we didn't observe the role of BMI in this study. In our study, average BMI for shift workers is a little lower than that for day workers. And percentage of BMI>24 in shift group (52.4%) is lower than day work group (53.7%), but there is no

significant difference. Increased BMI in nurse's cohort may attribute to eating habits of shift participants, and shift-workers need to be educated to cope better with shift-work related eating, sleeping and exercising habits [36].

The relationship between shift work and hypertension is still in debate. Several researches suggested that rotating night shift work was an independent risk factor for hypertension [7,37,38]. Possible mechanism of shift work inducing hypertension is that shift workers have a more activated sympathetic nervous system, greater endothelial dysfunction, more arterial stiffness, and different renal sodium handling. These factors increased the susceptibility to hypertension for shift workers [14,37,39]. Another study by Lieu *et al* also observed that black American were more susceptible to shift work related hypertension than white American because black American had a more activated sympathetic nervous system [37]. However, the study by Sfreddo *et al* indicated that night shift work did not increase blood pressure and was not associated with hypertension or pre-hypertension [40]. Our study of 9,118 shift participants and 17,345 day workers observed that the ORs of hypertension in shift group was significantly increased, especially in the participants engaged in shift work for more than 10 years.

The strengths of this study include its large sample size and detailed information on duration of shift work and other confounders. So far as we know, this is the largest study of retired workers to study shift work and its association with retired workers' sleeping quality, and widely concerned aging people chronic diseases: diabetes and hypertension. Unfortunately, We cannot distinguish type 2 diabetes from type 1 diabetes in our study, but studies have confirmed that type 2 diabetes takes up 93% of diabetes patients in the elderly [41]. Furthermore, we did not collect data on dietary patterns, income and environmental noise;

therefore we were unable to evaluate the confounding influences. However, the participants are from one big company and living in one town and diet patterns were likely to be relatively homogeneous.

## Conclusion

In conclusion, this study suggested that shift work may be an independent risk factor for sleeping quality, diabetes and hypertension in retired workers. Shift work mainly affect sleeping quality in the early duration of shifts (<10 years), the effect on sleeping quality will decrease as time of leaving shifts extends, and the risk will come to the baseline after shift workers leave shift position for more than 20 years. The risks for diabetes or hypertension significantly increase after people worked on shifts for more than 20 years.

## References

- Itani O, Kancita Y, Murata A, Yokoyama E, Ohida T (2011) Association of onset of obesity with sleep duration and shift work among Japanese adults. *Sleep Med* 12: 341–345.
- Pan A, Schernhammer ES, Sun Q, Hu FB (2011) Rotating night shift work and risk of type 2 diabetes: two prospective cohort studies in women. *PLoS Med* 8: e1001141.
- De Bacquer D, Van Risseghem M, Clays E, Kittel F, De Backer G, et al. (2009) Rotating shift work and the metabolic syndrome: a prospective study. *Int J Epidemiol* 38: 848–854.
- Santorek-Strumillo E, Zawilska JB, Misiak P, Jablonski S, Kordiak J, et al. (2012) [Influence of the shift work on circadian-rhythms compare survey on health service employees and policemen]. *Przegl Lek* 69: 103–106.
- COPERTARO A (2011) Influence of Shift-work on Selected Immune Variables in Nurses. *Industrial Health* 49: 597–604.
- Antunes LC, Levandovski R, Dantas G, Caumo W, Hidalgo MP (2010) Obesity and shift work: chronobiological aspects. *Nutr Res Rev* 23: 155–168.
- McCubbin JA, Pilcher JJ, Moore DD (2010) Blood pressure increases during a simulated night shift in persons at risk for hypertension. *Int J Behav Med* 17: 314–320.
- Gangwisch JE, Feskanich D, Malaspina D, Shen S, Forman JP (2013) Sleep Duration and Risk for Hypertension in Women: Results from The Nurses' Health Study. *Am J Hypertens*.
- Ika K (2013) Shift Work and Diabetes Mellitus among Male Workers in Japan: Does the Intensity of Shift Work Matter? *Acta Med Okayama* 67: 25–33.
- Vyas MV, Garg AX, Iansavichus AV, Costella J, Donner A, et al. (2012) Shift work and vascular events: systematic review and meta-analysis. *Bmj* 345: e4800–e4800.
- Yong M, Nasterlack M (2012) Shift work and cancer: state of science and practical consequences. *Arh Hig Rada Toksikol* 63: 153–160.
- Wang XS, Armstrong ME, Cairns BJ, Key TJ, Travis RC (2011) Shift work and chronic disease: the epidemiological evidence. *Occup Med (Lond)* 61: 78–89.
- Gumenyuk V, Roth T, Drake CL (2012) Circadian phase, sleepiness, and light exposure assessment in night workers with and without shift work disorder. *Chronobiol Int* 29: 928–936.
- Ulas T, Buyukhatipoglu H, Kirhan I, Dal MS, Eren MA, et al. (2012) The effect of day and night shifts on oxidative stress and anxiety symptoms of the nurses. *Eur Rev Med Pharmacol Sci* 16: 594–599.
- Monk TH, Buysse DJ, Billy BD, Fletcher ME, Kennedy KS, et al. (2012) Shiftworkers report worse sleep than day workers, even in retirement. *J Sleep Res*.
- Wang F, Zhu J, Yao P, Li X, He M, et al. (2012) Cohort profile: The Dongfeng-Tongji cohort study of retired workers. *Int J Epidemiol*.
- WHO (2003) 2003 World Health Organization (WHO)/International Society of Hypertension (ISH) statement on management of hypertension. Guidelines.
- Liu Y, Chen W (2012) A SAS macro for testing differences among three or more independent groups using Kruskal-Wallis and Nemenyi tests. *J Huazhong Univ Sci Technolog Med Sci* 32: 130–134.
- Ioja S, Weir ID, Rennert NJ (2012) Relationship between sleep disorders and the risk for developing type 2 diabetes mellitus. *Postgrad Med* 124: 119–129.
- Wehrens SM, Hampton SM, Finn RE, Skene DJ (2010) Effect of total sleep deprivation on postprandial metabolic and insulin responses in shift workers and non-shift workers. *J Endocrinol* 206: 205–215.
- Pilcher JJ, Lambert BJ, Huffcutt AI (2000) Differential effects of permanent and rotating shifts on self-report sleep length: a meta-analytic review. *Sleep* 23: 155–163.
- Wagstaff AS, Sigstad Lie J-A (2011) Shift and night work and long working hours – a systematic review of safety implications. *Scand J Work Environ Health* 37: 173–185.
- Smith-Coggins R (1997) Rotating Shiftwork Schedules: Can We Enhance Physician Adaptation to Night Shifts? *Acad Emerg Med* 4: 951–961.
- Sallinen M, Kecklund G (2010) Shift work, sleep, and sleepiness - differences between shift schedules and systems. *Scand J Work Environ Health* 36: 121–133.
- Mansukhani MP, Kolla BP, Surani S, Varon J, Ramar K (2012) Sleep deprivation in resident physicians, work hour limitations, and related outcomes: a systematic review of the literature. *Postgrad Med* 124: 241–249.
- Haus EL, Smolensky MH (2012) Shift work and cancer risk: Potential mechanistic roles of circadian disruption, light at night, and sleep deprivation. *Sleep Med Rev*.
- Niu SF, Chu H, Chen CH, Chung MH, Chang YS, et al. (2012) A Comparison of the Effects of Fixed- and Rotating-Shift Schedules on Nursing Staff Attention Levels A Randomized Trial. *Biol Res Nurs*.
- Chen H, Schernhammer E, Schwarzschild MA, Ascherio A (2006) A prospective study of night shift work, sleep duration, and risk of Parkinson's disease. *Am J Epidemiol* 163: 726–730.
- Andreas Stang MND, PhD (2007) Daily Siesta, Cardiovascular Risk Factors, and Measures of Subclinical Atherosclerosis: Results of the Heinz Nixdorf Recall Study. *Sleep Med* 30: 9.
- Chan MF (2009) Factors associated with perceived sleep quality of nurses working on rotating shifts. *J Clin Nurs* 18: 285–293.
- Juda M, Vetter C, Roenneberg T (2013) Chronotype modulates sleep duration, sleep quality, and social jet lag in shift-workers. *J Biol Rhythms* 28: 141–151.
- Bjorvatn B PS (2009) Practical approaches to circadian rhythm sleep disorders. *Sleep Medicine Reviews* 13: 47–60.
- Morikawa Y, Nakagawa H, Miura K, Soyama Y, Ishizaki M, et al. (2005) Shift work and the risk of diabetes mellitus among Japanese male factory workers. *Scand J Work Environ Health* 31: 179–183.
- Suwazono Y, Sakata K, Okubo Y, Harada H, Oishi M, et al. (2006) Long-term longitudinal study on the relationship between alternating shift work and the onset of diabetes mellitus in male Japanese workers. *J Occup Environ Med* 48: 455–461.
- EIICHI MIKUNI TO, KOJI HAYASHI, KEI MIYAMURA (1983) Glucose Intolerance in an Employed Population. *Tohoku J exp Med*.
- John Axelsson SP (2012) Night shift work increases the risk for type 2 diabetes. *Evidence-Based Medicine* 17.
- Lieu SJ, Curhan GC, Schernhammer ES, Forman JP (2012) Rotating night shift work and disparate hypertension risk in African-Americans. *J Hypertens* 30: 61–66.
- Suwazono Y, Dochi M, Sakata K, Okubo Y, Oishi M, et al. (2008) Shift work is a risk factor for increased blood pressure in Japanese men: a 14-year historical cohort study. *Hypertension* 52: 581–586.
- Khabour OF, Wehaibi SH, Al-Azzam SI, Alzoubi KH, El-Akawi ZJ (2012) Association of Adiponectin with Hypertension in Type 2 Diabetic Patients: the Gender Effect. *Clin Exp Hypertens*.
- Sfreddo C (2010) Shift Work Is Not Associated with High Blood Pressure or Prevalence of Hypertension. *PLoS ONE* 5: e15250.
- Islam S, Harnarayan P, Cawich SO, Budhooram S, Bheem V, et al. (2013) Epidemiology of diabetic foot infections in an eastern Caribbean population: a prospective study. *Perm J* 17: 37–40.

## Acknowledgments

We gratefully acknowledge all the study participants and staff of the Health Examination Center of the Dongfeng Central Hospital and the Medical Insurance Center of DMC. We also thank the interviewers from the retirement management office of DMC and from Tongji Medical College, HUST. The Tongji–Dongfeng Cohort Study is collaboration between the Tongji Medical College, Huazhong University of Science and Technology, the DMC and the Harvard School of Public Health.

## Author Contributions

Performed the experiments: YG YL YR XH WC MH YW JY TW. Analyzed the data: YG YL WC. Contributed reagents/materials/analysis tools: YG WC. Wrote the paper: YG.
